# Supplementary material
Source: PubMed Central journal article supplement (PMC3430989)
Supplement: supp_ers158_00075705-file001.pdf [file supp_ers158_00075705-file001.pdf]

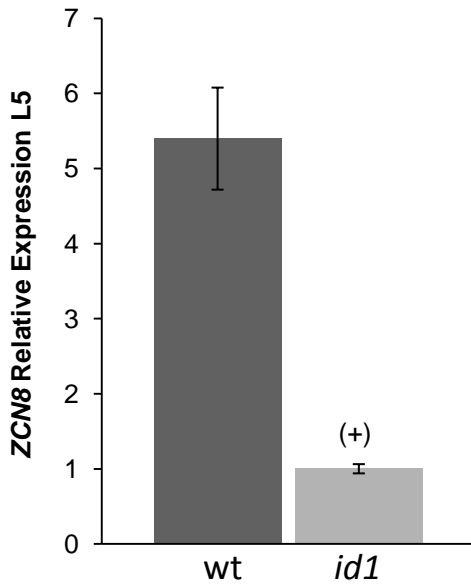

**Figure S1.** qRT-PCR analysis of *ZCN8* expression level in mature leaf five of V7 wild type (wt) plants relative to *id1* mutants at the same developmental stage. (+) denotes statistical significance based on a *t*-test ( $P < 0.05$ ,  $n = 5$ ). Error bars represent SD.

A

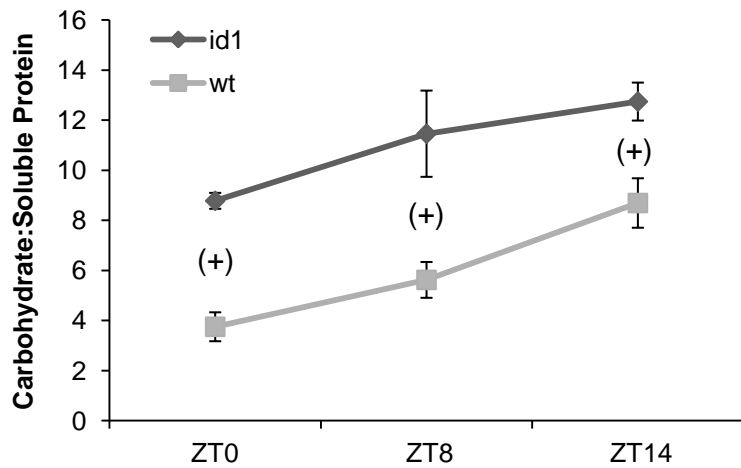

B

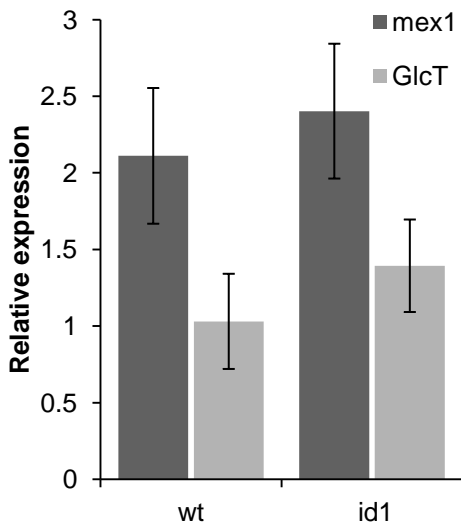

C

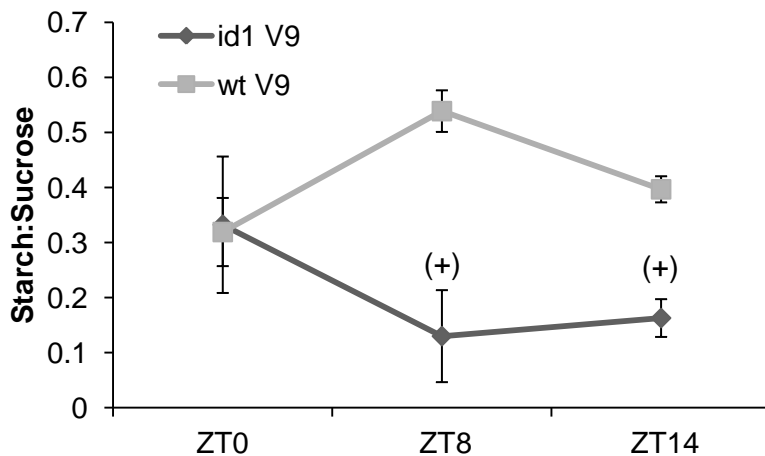

**Figure S2.** A, Total carbohydrate (sucrose plus starch) to soluble protein ratio in *id1* and wt mature leaf 5 at V7. B, Relative expression levels of a putative maize maltose transporter gene (*maltose excess1*, *mex1*) and a glucose translocator gene (*GlcT*) in wt and *id1* mature leaves. C, Starch to sucrose ratio in source leaves of *id1* and wt plants after the floral transition (V9).

Bars represent SD (n = 5) and statistical significance (+) is evaluated at the P < 0.05 level.

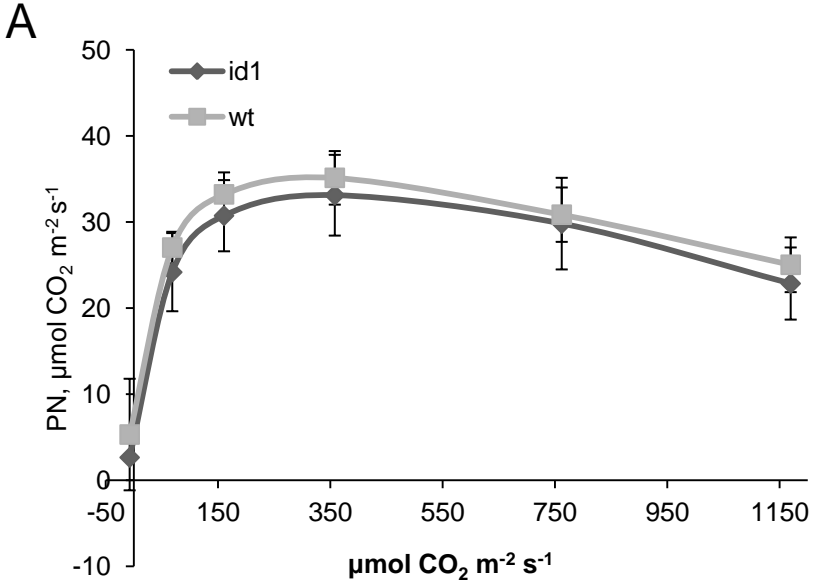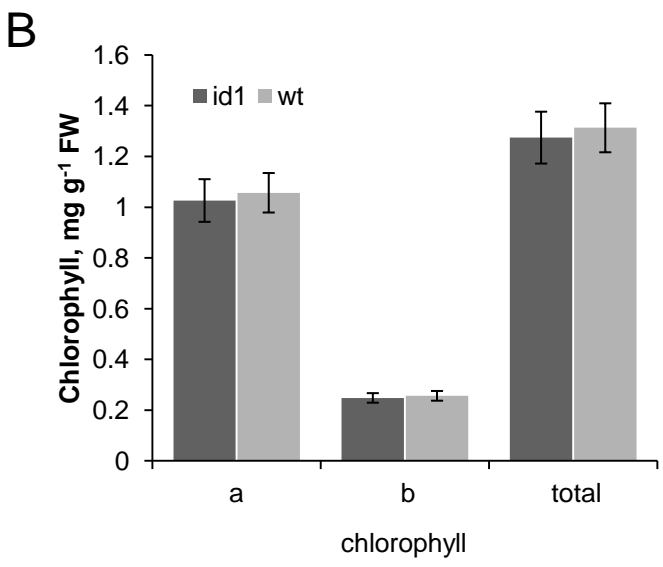

**Figure S3.** A, Carbon dioxide ( $\text{CO}_2$ ) response curve for photosynthesis of *id1* and wt leaf five at the V7 stage. B, Chlorophyll quantification of *id1* and wt leaf five at the V7 stage. Bars represent SD ( $n = 5$ ) and statistical significance (+) is evaluated at the  $P < 0.05$  level.

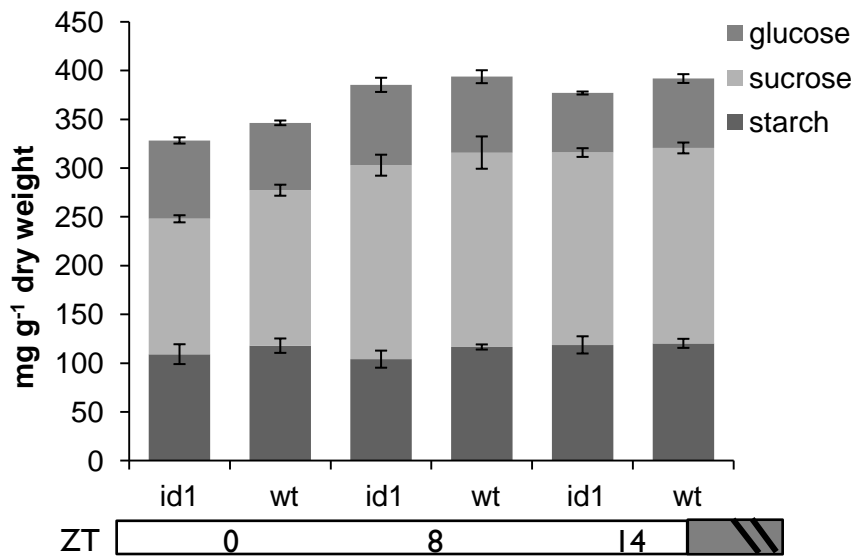

**Figure S4.** Comparison of starch, sucrose, and glucose levels in immature sink leaves of *id1* mutants relative to normal-flowering V7 maize plants.
